# Supplementary material
Source: publisher figshare collection journal article supplement (https://gsapubs.figshare.com/articles/dataset/_/12598616)

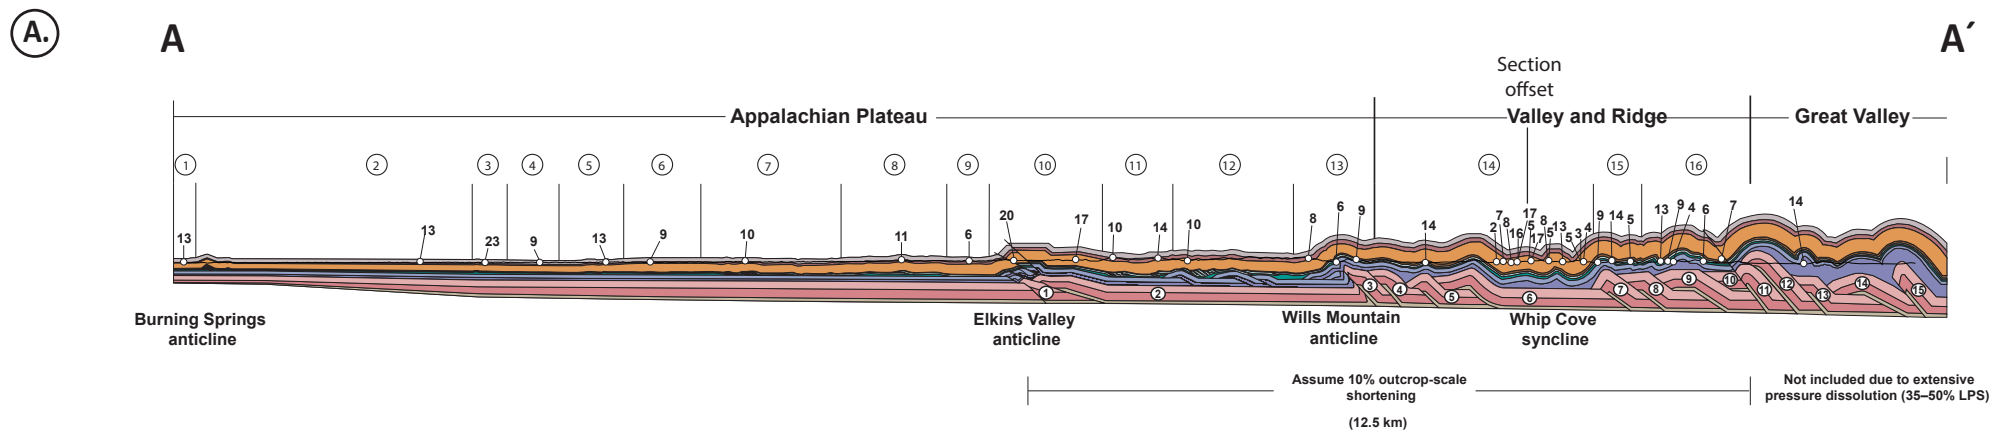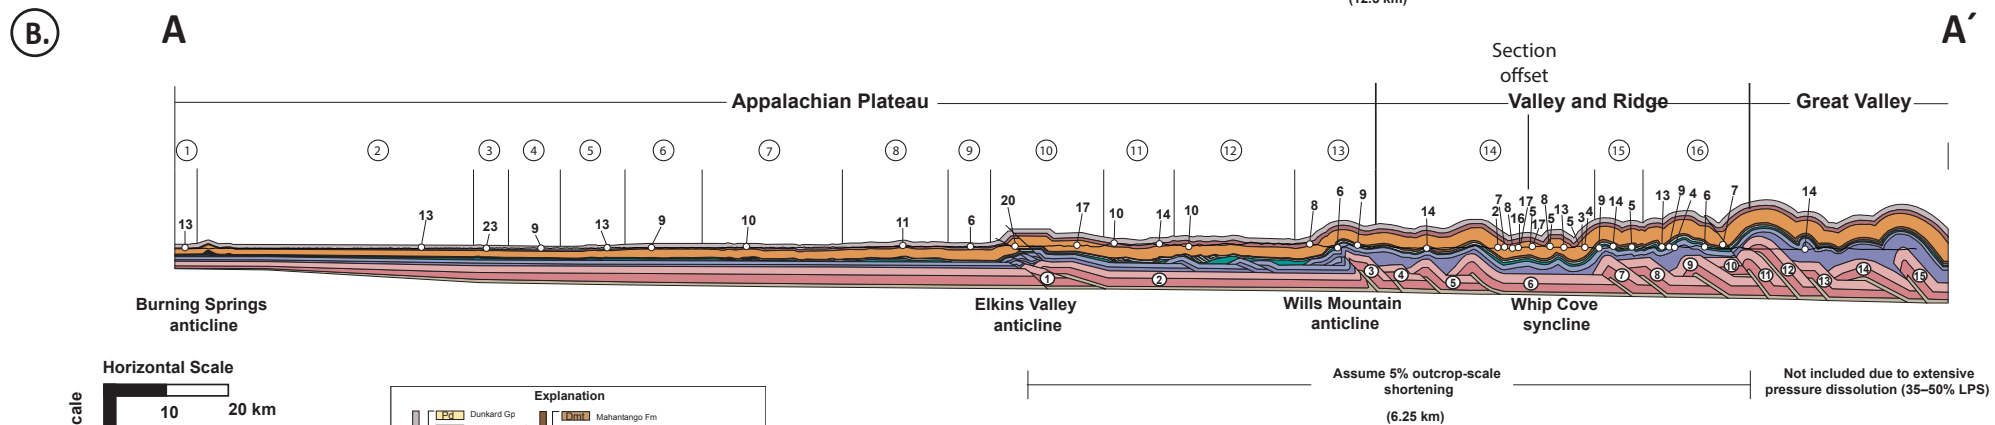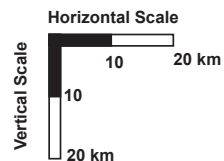

**Explanation**

Vertical color bars reflect groupings depicted in the cross section.

Supplement: Supplementary file 2 [file 2]
